# Supplementary material for: In situ growth of CdTe nanostructures from a novel electrodeposition bath: tuning of electrical properties and reuse of ionic liquid
Source: Royal Society of Chemistry journal article supplement (doi:10.1039/c4nj01530d), 2015-01-01
Supplement: c4nj01530d1.pdf [file c4nj01530d1.pdf]

## Supporting Information

### New Journal of Chemistry

For

In-situ growth of CdTe nanostructures from novel electrodeposition bath: Tuning of electrical properties and Reuse of Ionic liquid

Khushbu R Chauhan, Dipal B Patel and Indrajit Mukhopadhyay

SI-Figure-1a: EDX spectrum for the overall nanostructured CdTe thin film.

SI-Figure-1b: EDX spectrum for the nanostructures.

SI-Figure-2: TauC plot for the determination of the CdTe thin film.

SI-Figure-3a & b: Length and diameter of the structures measured by SEM length tool: the variation is shown for a typical bath of 1:10 Te: Cd in IL.

SI-Figure-4: Photographs of the ionic liquids after Re-Use.

SI-Figure-5: TEM images of the ionic liquid (a drop of ionic liquid dispersed in the solution of methanol).

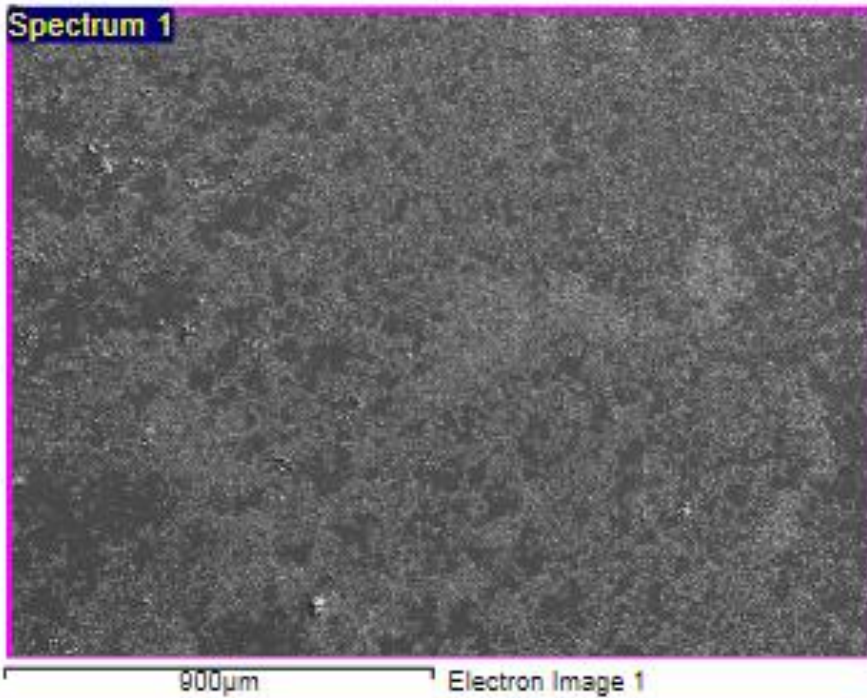

|            |         |                     |
|------------|---------|---------------------|
| Standard : |         |                     |
| Cd         | Cd      | 1-Jun-1999 12:00 AM |
| Te         | HgTe    | 1-Jun-1999 12:00 AM |
| Elem...    | Weight% | Atomic%             |
| Cd L       | 4.53    | 52.34               |
| Te L       | 4.68    | 47.66               |
| Totals     | 9.21    |                     |

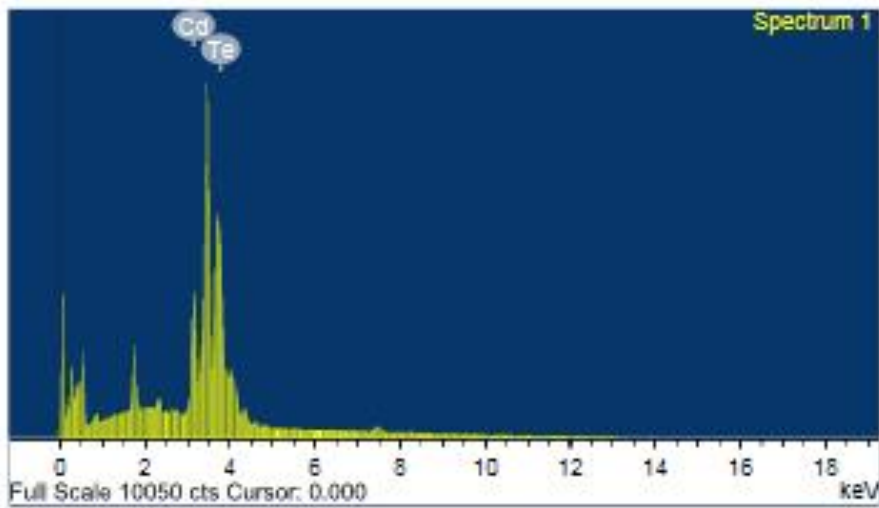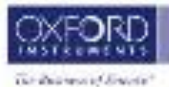

SI-Figure-1a: EDX spectrum for the nanostructured CdTe thin film.

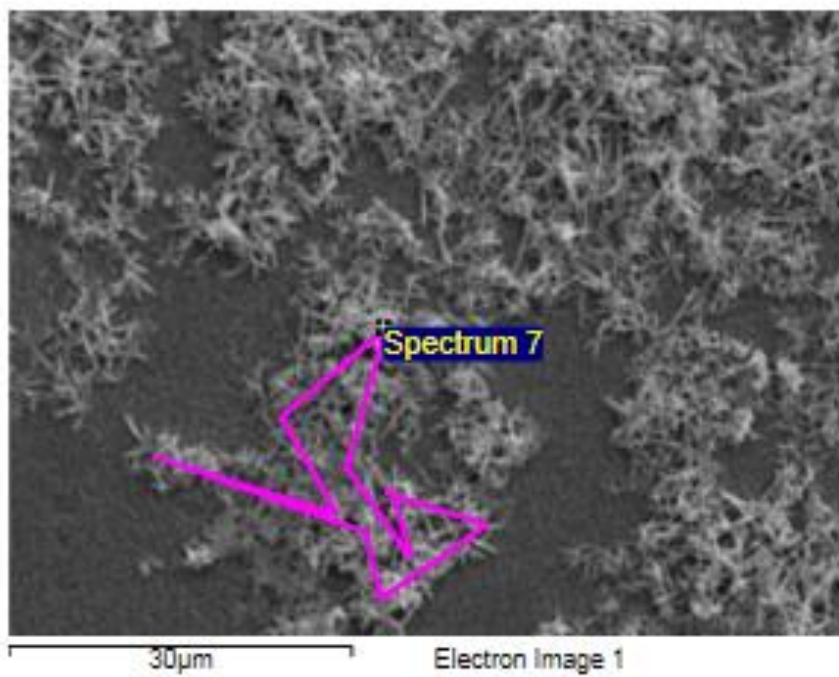

|                         |       |                     |  |
|-------------------------|-------|---------------------|--|
| Standard :              |       |                     |  |
| Cd                      | Cd    | 1-Jun-1999 12:00 AM |  |
| Sn                      | Sn    | 1-Jun-1999 12:00 AM |  |
| Te                      | HgTe  | 1-Jun-1999 12:00 AM |  |
| Elem... Weight% Atomic% |       |                     |  |
| Cd L                    | 9.04  | 24.83               |  |
| Sn L                    | 19.21 | 49.94               |  |
| Te L                    | 10.43 | 25.23               |  |
| Totals                  | 38.68 |                     |  |

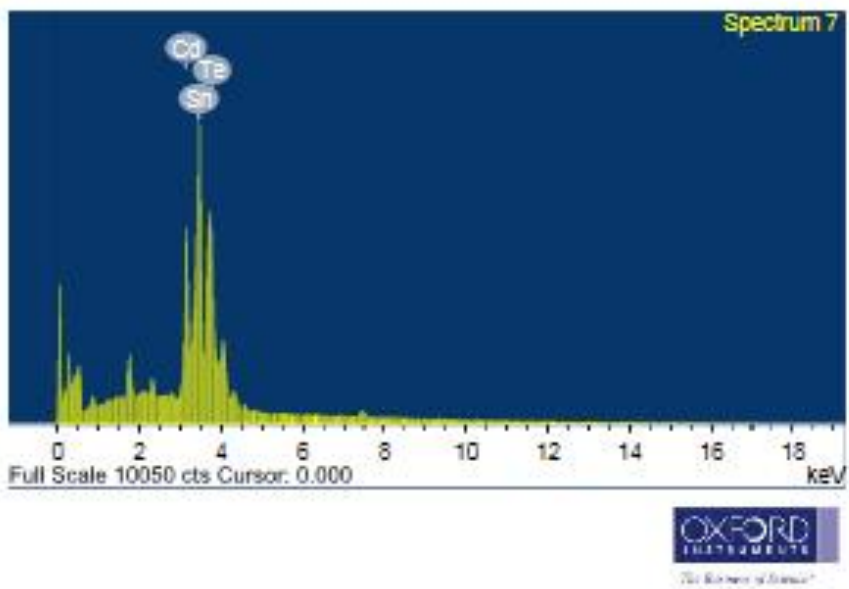

SI-Figure-1b: EDX spectrum for the nanostructures.

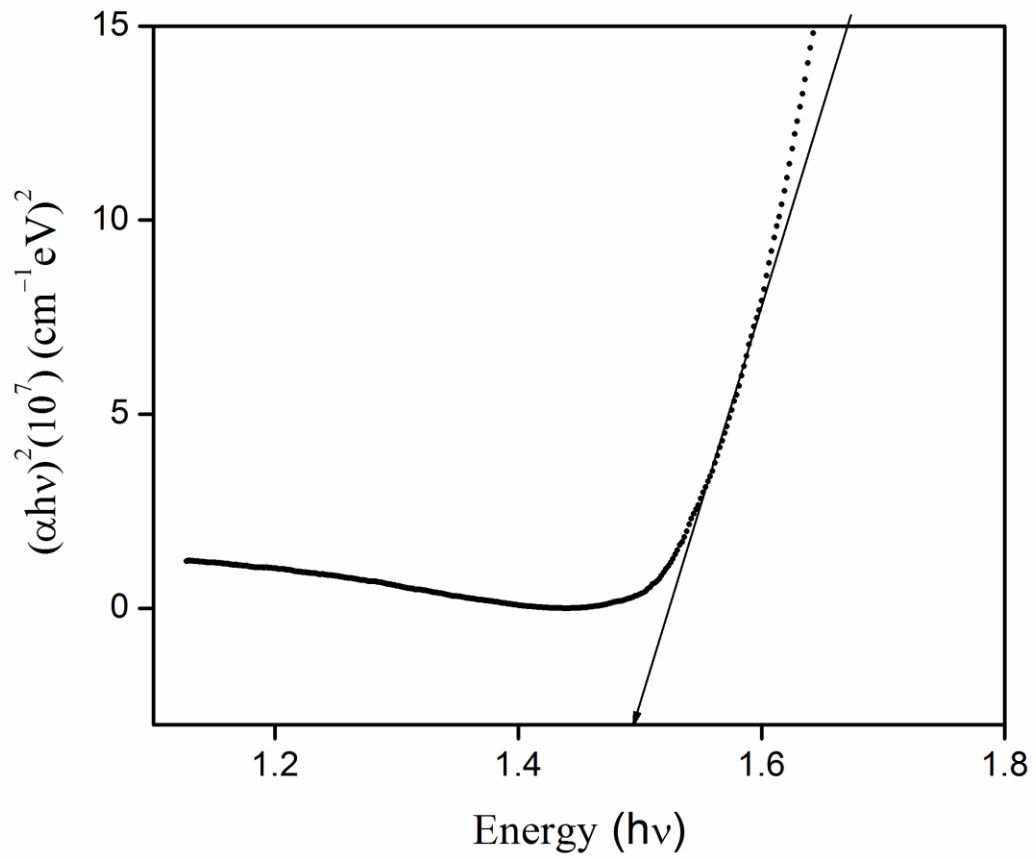

SI-Figure-2: TauC plot for the determination of the CdTe thin film.

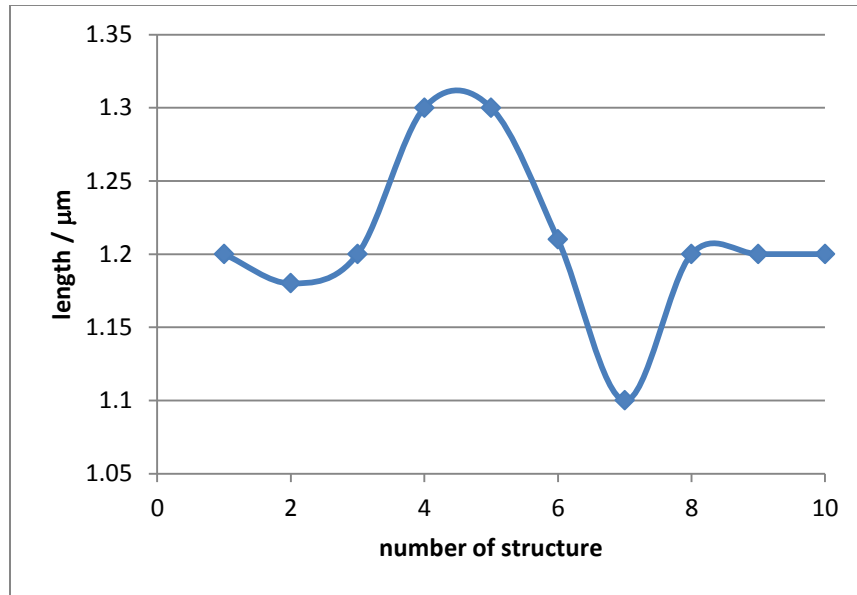

SI-Figure-3a: Length of the structures measured by SEM length tool, during a typical deposition (1:10 Te:Cd) the average length was found to be 1.2 μm.

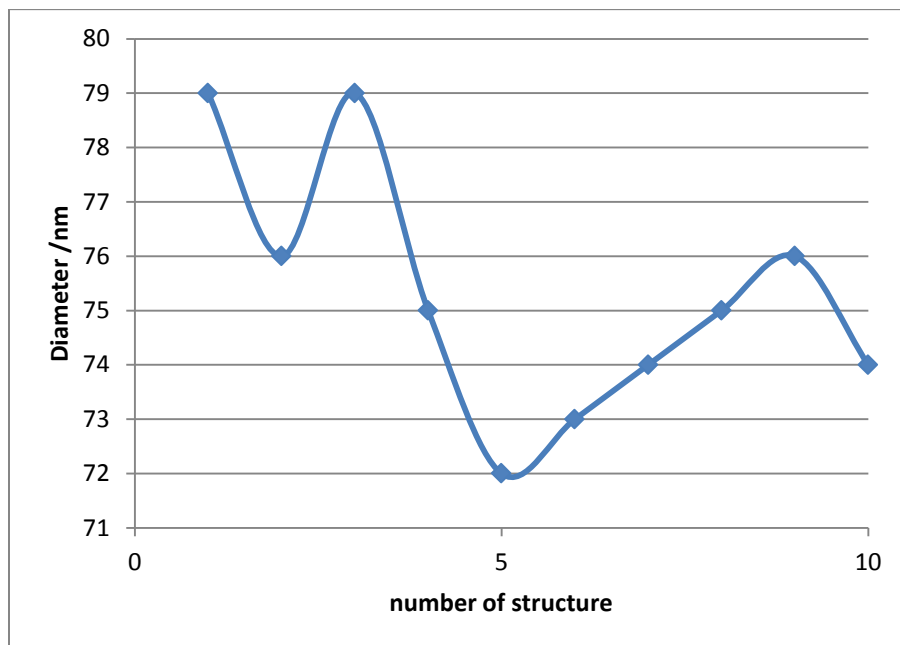

SI-Figure-3b: Diameter of the structures measured by SEM length tool, during a typical deposition (1:10 Te:Cd) the average diameter was found to be 75 nm.

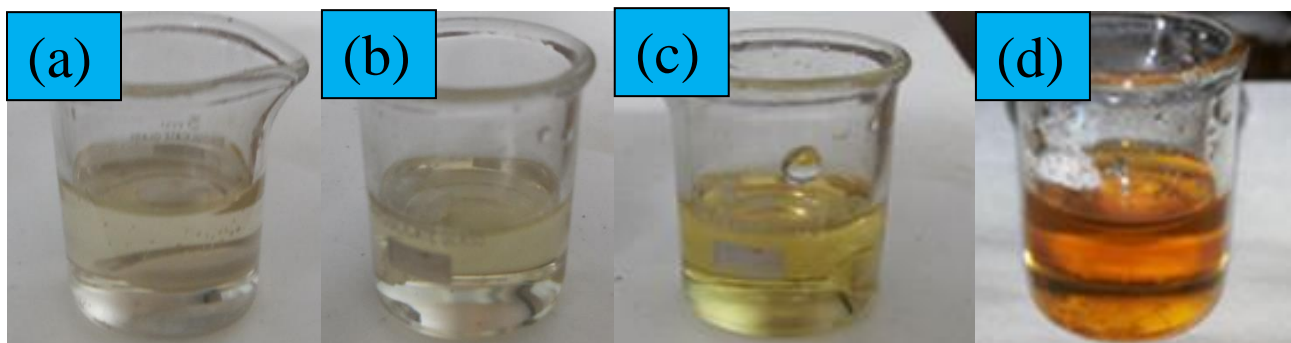

SI-Figure-4: Photographs of the ionic liquids after Re-Use (a) after 1<sup>st</sup> (b) 2<sup>nd</sup> (c) 3<sup>rd</sup> (d) 4<sup>th</sup> run.

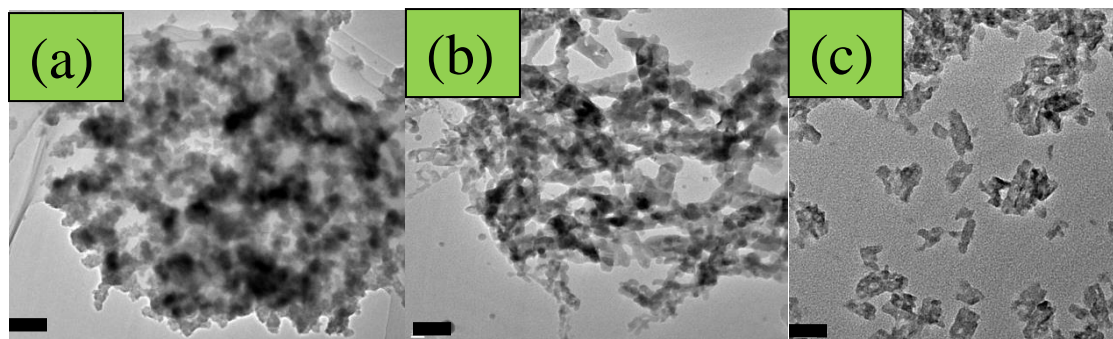

SI-Figure-5: TEM images of the ionic liquid (a) after 1<sup>st</sup> run (b) 2<sup>nd</sup> run (c) 3<sup>rd</sup> run (a drop of used ionic liquid dispersed in the solution of methanol), the scale bar shows 20 nm length.
